# Supplementary material for: Quantification of green fluorescent protein-(GFP-) tagged membrane proteins by capillary gel electrophoresis
Source: Royal Society of Chemistry journal article supplement (doi:10.1039/c7an00981j), 2017-01-01
Supplement: c7an00981j1.pdf [file c7an00981j1.pdf]

## Supporting Information

### *Quantification of green fluorescent protein-(GFP-) tagged membrane proteins by capillary gel electrophoresis*

Azeem Danish<sup>#</sup>, Sang-Yong Lee<sup>#</sup>, and Christa E. Müller<sup>\*</sup>

*PharmaCenter Bonn, Pharmaceutical Institute, Pharmaceutical Chemistry I, University of Bonn, An der Immenburg 4, D-53121 Bonn, Germany*

# Both authors contributed equally to this study

\* Address correspondence to:

Prof. Dr. Christa E. Müller, Pharmazeutisches Institut, Pharmazeutische Chemie I, An der Immenburg 4, D-53121 Bonn, Germany. Phone: +49-228-73-2301. Fax: +49-228-73-2567. E-mail address: [christa.mueller@uni-bonn.de](mailto:christa.mueller@uni-bonn.de)

#### **Table of contents**

|                                                                                                                                    |      |
|------------------------------------------------------------------------------------------------------------------------------------|------|
| <b>Table S1</b> Primers used for the project                                                                                       | p. 2 |
| <b>Table S2</b> Quantification of GFP-tagged proteins by CE-LIF                                                                    | p. 3 |
| <b>Fig. S1</b> Calibration curve for GFP determined by CGE-LIF                                                                     | p. 5 |
| <b>Fig. S2</b> Calibration curve for GFP determined in a fluorimeter                                                               | p. 5 |
| <b>Fig. S3</b> Separation of free GFP (standard) and SV2A-GFP in a cellular homogenate                                             | p. 6 |
| <b>Fig. S4</b> Effect of SDS (1%) in the sample buffer on peak area of SV2A-GFP measured after different incubation times          | p. 6 |
| <b>Fig. S5</b> Effect of 1% SDS in sample buffer and semi-liquid gel on fluorescence intensity of free GFP and SV2A-GFP homogenate | p. 7 |
| Calculation of $B_{\max}$ values for SV2A-GFP from radioligand binding data                                                        | p. 8 |

**Table S1** Primers used for the project**Primers for pcDNA4-hSV2A-GFP**

| Overlaps       | Oligonucleotide (upper case = annealing sequence for PCR) | Anneals | F/R |
|----------------|-----------------------------------------------------------|---------|-----|
| pcDNA4-HindIII | agaccaagctggctagttaagcttACCATGGAAGAGGGCTTCCG              | hSV2A   | Fwd |
| pcDNA4-XhoI    | agaccaagctggctagttaagcttACCATGGAAGAGGGCTTCCG              | GFP     | Rev |

**Primers for pcDNA4-hA<sub>2A</sub>-GFP**

| Overlaps         | Oligonucleotide (upper case = annealing sequence for PCR) | Anneals          | F/R |
|------------------|-----------------------------------------------------------|------------------|-----|
| pcDNA4           | agaccaagctggctagttaagcttACCATGCCCATCATGGGC                | hA <sub>2A</sub> | Fwd |
| GFP              | cgccccctcgacGGACTCCTGCTCCATC                              | hA <sub>2A</sub> | Rev |
| hA <sub>2A</sub> | aggagtgtccGTCGACGGGGGCGGCGGA                              | GFP              | Fwd |
| pcDNA4           | gttcgaaggccctctagactcgagTTACTTGTACAGCTCGTCCATGCCGAGAGTG   | GFP              | Rev |

**Primers for pcDNA4-mCx43**

| Overlaps | Oligonucleotide (upper case = annealing sequence for PCR) | Anneals | F/R |
|----------|-----------------------------------------------------------|---------|-----|
| pCDNA4   | agaccaagctggctagttaagcttACCATGGGTGACTGGAGC                | mCx43   | Fwd |
| eGFP     | cgccccctcgacAATCTCCAGGTCATCAGGC                           | mCx43   | Rev |
| mCx43    | cctggagattGTCGACGGGGGCGGCGGA                              | GFP     | Fwd |
| pcDNA4   | gttcgaaggccctctagactcgagTTACTTGTACAGCTCGTCCATGCCGAGAGTG   | GFP     | Rev |

**Table S2** Quantification of GFP-tagged proteins by CE-LIF<sup>a</sup>

| <b>SV2A-GFP</b> | <b>peak area</b> | <b>mg/ml</b> | <b>ng/ml</b> | <b>1:100 dilution<br/>(ng/ml)</b> | <b>nmol/l</b> | <b>pmol/ml</b> | <b>total amount<br/>(mg/ml)</b> | <b>pmol/mg</b> |
|-----------------|------------------|--------------|--------------|-----------------------------------|---------------|----------------|---------------------------------|----------------|
| Test 1          | 69044            | 0.00016295   | 162.95492    | 16295.4921                        | 0.1393        | 139.3          | 5.00                            | 27.9           |
| Test 2          | 60554            | 0.00014292   | 142.91716    | 14291.7158                        | 0.1222        | 122.2          | 5.00                            | 24.4           |
| Test 3          | 69134            | 0.00016317   | 163.16734    | 16316.7335                        | 0.1395        | 139.5          | 5.00                            | 27.9           |
|                 |                  |              |              |                                   |               |                | <b>mean</b>                     | <b>26.7</b>    |

  

| <b>A<sub>2A</sub>AR-GFP</b> | <b>peak area</b> | <b>mg/ml</b> | <b>ng/ml</b> | <b>1:20 dilution<br/>(ng/ml)</b> | <b>nmol/l</b> | <b>pmol/ml</b> | <b>total amount<br/>(mg/ml)</b> | <b>pmol/mg</b> |
|-----------------------------|------------------|--------------|--------------|----------------------------------|---------------|----------------|---------------------------------|----------------|
| Test 1                      | 2011             | 0.00000475   | 4.74628      | 94.9257                          | 1.3184119     | 1.32           | 12.0                            | 0.110          |
| Test 2                      | 2412             | 0.00000569   | 5.69271      | 113.8541                         | 1.5813075     | 1.58           | 12.0                            | 0.132          |
| Test 3                      | 2245             | 0.00000530   | 5.29856      | 105.9712                         | 1.4718223     | 1.47           | 12.0                            | 0.123          |
|                             |                  |              |              |                                  |               |                | <b>mean</b>                     | <b>0.121</b>   |

  

| <b>Cx43-GFP</b> | <b>peak area</b> | <b>mg/ml</b> | <b>ng/ml</b> | <b>1:2 dilution<br/>(ng/ml)</b> | <b>nmol/l</b> | <b>pmol/ml</b> | <b>total amount<br/>(mg/ml)</b> | <b>pmol/mg</b> |
|-----------------|------------------|--------------|--------------|---------------------------------|---------------|----------------|---------------------------------|----------------|
| Test 1          | 2341             | 0.00000553   | 5.52514      | 11.0503                         | 0.1579        | 0.158          | 4.70                            | 0.0336         |
| Test 2          | 3282             | 0.00000775   | 7.74605      | 15.4921                         | 0.2213        | 0.221          | 4.70                            | 0.0471         |
| Test 3          | 2692             | 0.00000635   | 6.35355      | 12.7071                         | 0.1815        | 0.182          | 4.70                            | 0.0386         |
|                 |                  |              |              |                                 |               |                | <b>mean</b>                     | <b>0.0398</b>  |

<sup>a</sup>Example of calculation (for test 1 of SV2A-GFP determination) is given on page 4.

### Calculation example for test 1 of SV2A-GFP determination

Peak area of SV2A-GFP: **69044**

Calibration curve:  $y = 423700000x - 0.00002178$

$$69044 = 423700000x - 0.00002178$$

$$x = (69044 + 0.00002178) / 423700000$$

$$x = 69044.00002178 / 423700000$$

$$x = \mathbf{0.00016295 \text{ mg / ml} = 162.95492 \text{ ng / ml}}$$

---

1:100 dilution

SV2A-GFP (162.95492 ng / ml) x 100

$$= \mathbf{16295.4921 \text{ ng / ml}}$$

---

Molecular weight of SV2A-GFP: 117 kDa = 117 x 1000 Da = 117000 Da = 117000 g/mol

$$(16295.4921 \text{ ng / ml}) / (117000 \text{ g/mol})$$

$$= 0.1393 \text{ (ng/ml x mol/g)}$$

$$= \mathbf{0.1393 \text{ nmol/ml}}$$

$$= \mathbf{139.3 \text{ pmol/ml}}$$

---

Total protein concentration according to the Bradford method: **5.00 mg/ml**

The calculated concentration of SV2A in the cell homogenate:

$$(139 \text{ pmol/ml}) / (5.00 \text{ mg/ml protein}) = 139 \text{ pmol} / 5.00 \text{ mg protein}$$

$$= \mathbf{27.9 \text{ pmol/mg protein}}$$

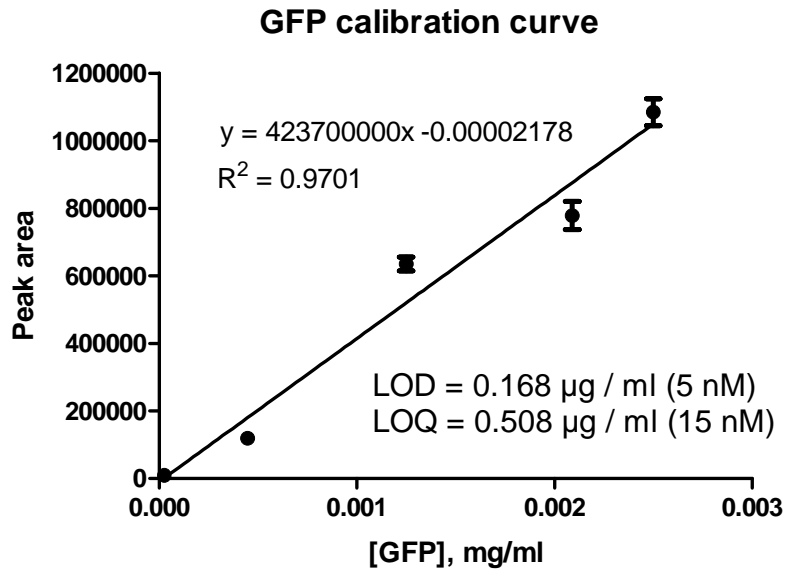

**Fig. S1** Calibration for GFP determined by CGE-LIF. Free GFP (in mg/ml) is plotted on the X-axis and the measured peak area is shown on the Y-axis. Data points are means  $\pm$  SD of three independent experiments. LOD: limit of detection; LOQ: limit of quantification.

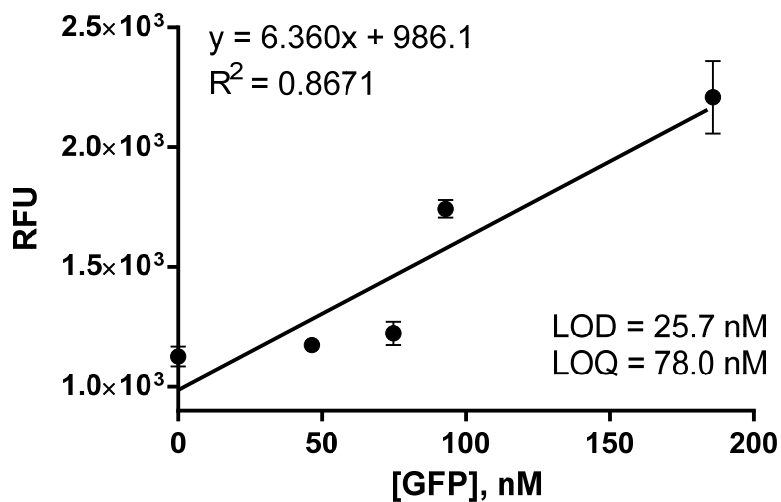

**Fig. S2** Calibration curve for GFP determined in a fluorimeter. The calibration curve was obtained by plotting the free GFP concentration in nM on the X-axis versus the corresponding fluorescence intensity on the Y-axis. The fluorescence of free GFP was measured in a black solid-bottom 96-well plate using a fluorescence plate reader (Mithras LB940, Berthold

Biotechnologies, Bad Wildbad, Germany). Data points represent means  $\pm$  SD of three independent measurements. LOD: limit of detection, LOQ: limit of quantification, RFU: relative fluorescence units.

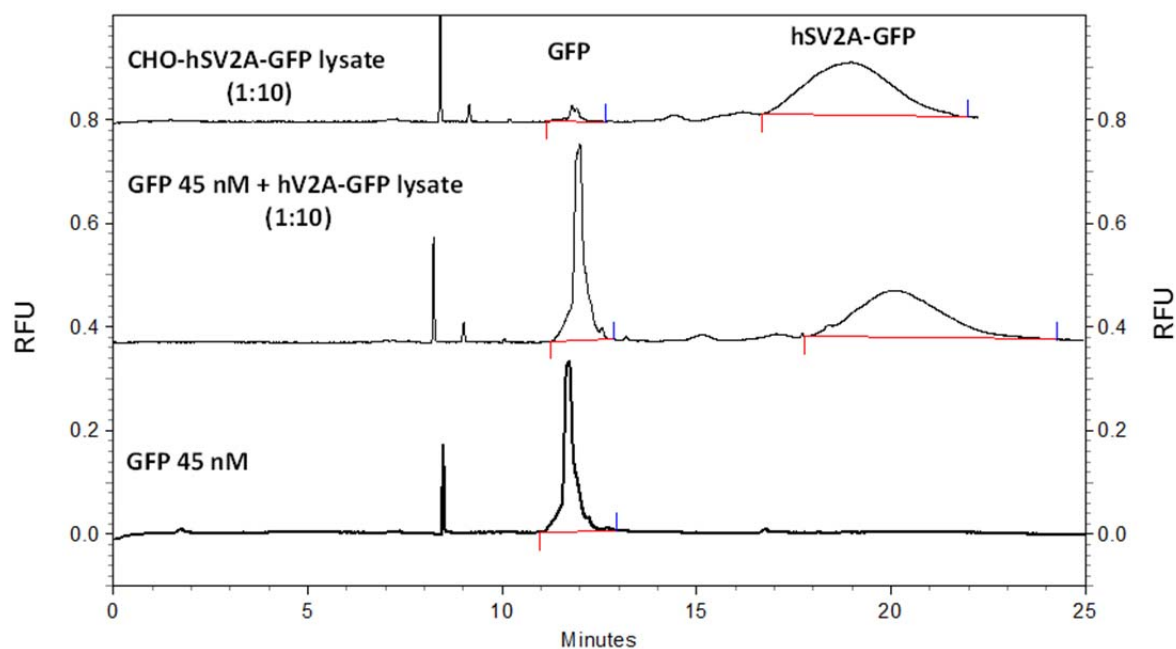

**Fig. S3** Separation of free GFP (standard) and SV2A-GFP in a cellular homogenate. RFU: relative fluorescence units.

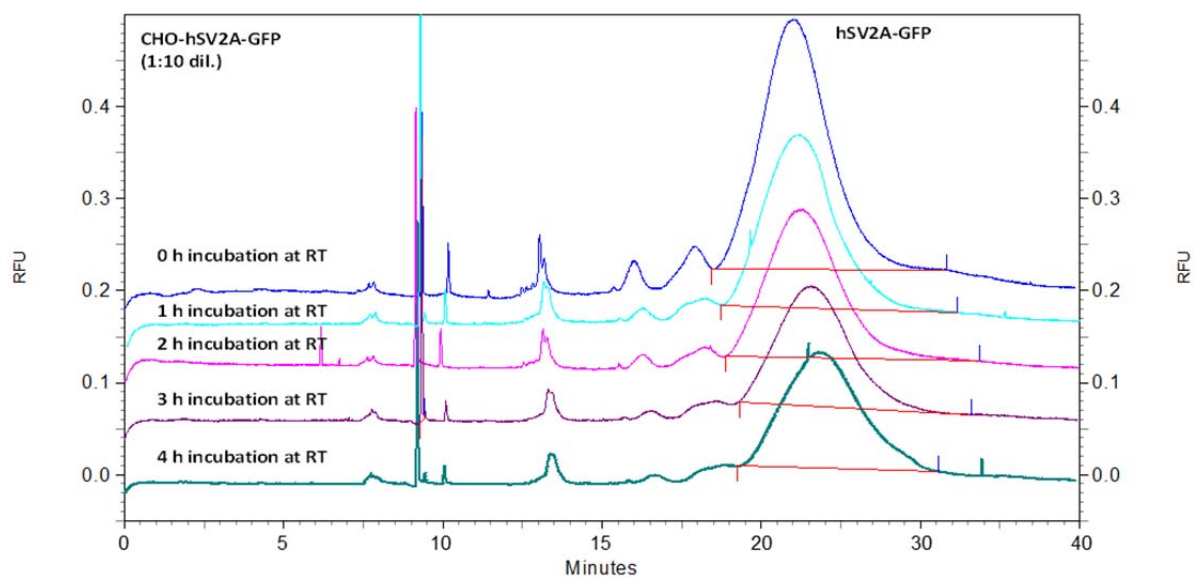

**Fig. S4** Effect of SDS (1%) in sample buffer on peak area of SV2A-GFP measured after different incubation times. RT: room temperature, RFU: relative fluorescence units.

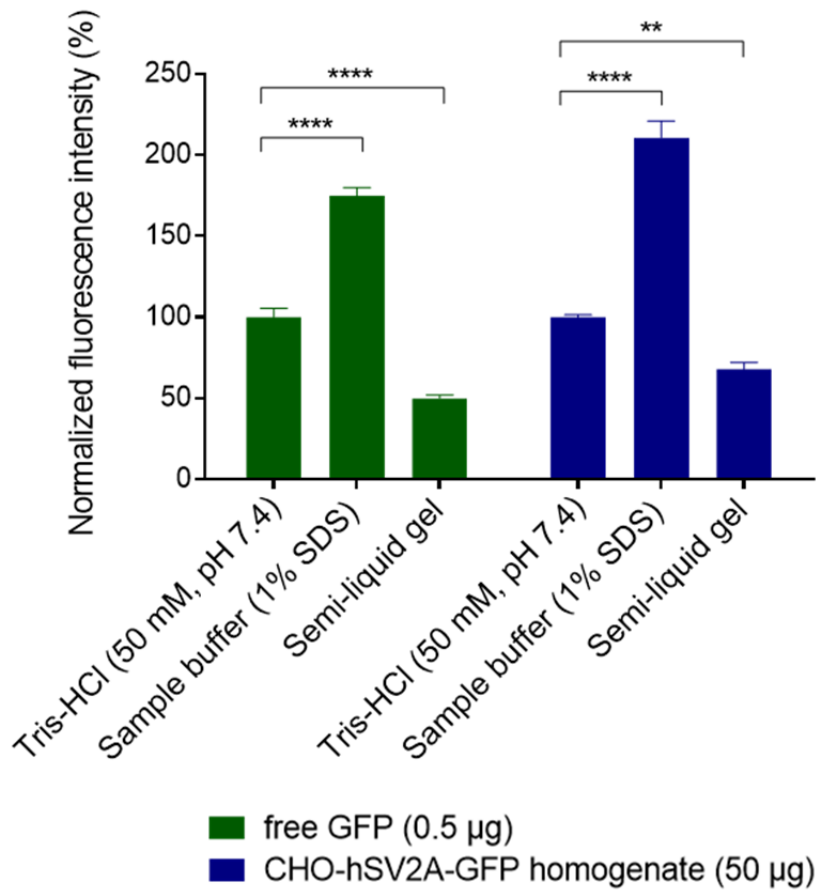

**Fig. S5** Effect of 1% SDS in sample buffer and semi-liquid gel on fluorescence intensity of free GFP and SV2A-GFP homogenate. Fluorescence intensity was measured using a microplate fluorimeter (Mithras LB940, Berthold Biotechnologies GmbH, Bad Wildbad, Germany) at room temperature using excitation (485/14 nm) and emission (535/25 nm) filters. Data is normalized versus respective controls (protein in Tris-HCl 50 mM, pH 7.4). Data shown are means  $\pm$  SEM of three individual experiments. Statistical analysis was performed by one-way-ANOVA with Dunnett's test for multiple comparisons, where control (Tris-HCl) was compared with sample buffer and semi-liquid gel. \*\*\*\*,  $p < 0.0001$ ; \*\*,  $p = 0.0060$ .

## Calculation of $B_{\max}$ values for SV2A-GFP from radioligand binding data

$K_D$  and  $B_{\max}$  calculations:

For homologous competition binding assays:

$$K_D = K_i = IC_{50} - RL$$

$K_D$ : equilibrium dissociation constant (nM)

$K_i$ : equilibrium inhibition constant (nM)

$IC_{50}$ : half maximal inhibitory concentration (nM)

$RL$ : measured concentration of radioligand (nM)

$$K_D = 83.5 \text{ nM} - 2.0 \text{ nM} = 81.5 \text{ nM}$$

---

$$B_{\max} \text{ (cpm)} = (\text{Top} - \text{Bottom}) \text{ Specific Binding} / (RL / (K_D + RL))$$

$B_{\max}$ : maximum number of binding sites (cpm)

Top: total binding of radioligand (cpm)

Bottom: non-specific binding of radioligand (cpm)

$$B_{\max} \text{ (cpm)} = (2839 - 437) / (2.0 / (81.5 + 2.0)) = 100283 \text{ cpm}$$

---

$B_{\max}$  (fmol/mg) =  $B_{\max}$  (cpm) \* 100 / efficiency (%) x 2.2 x specific activity (Ci/mmol) x protein (mg)

Specific activity of [ $^3\text{H}$ ]BRV = 94 Ci/mmol

Scintillation counter efficiency = 52%

Specific activity cpm/fmol = 108.5 cpm/fmol

Protein amount = 0.2 mg

$B_{\max}$  (fmol/mg) =  $B_{\max}$  (cpm) x 100 / efficiency (%) x 2.2 x specific activity (Ci/mmol) x protein (mg)

$$B_{\max} \text{ (fmol/mg)} = 100283 \times 100 / (52 \times 2.2 \times 94 \times 0.2) = 4663 \text{ fmol/mg protein}$$
